# Supplementary material
Source: PubMed Central journal article supplement (PMC7965370)
Supplement: 2581_tables.pdf [file 2581_tables.pdf]

| On-line Table 1: Quantitative comparison of all tensor metrics for all regions of interest among abscesses, GB, and metastases <sup>a</sup> |               |               |               |               |                 |            |
|---------------------------------------------------------------------------------------------------------------------------------------------|---------------|---------------|---------------|---------------|-----------------|------------|
| Region/Metric                                                                                                                               | Abscess       | GB            | Mets          | Abscess vs GB | Abscess vs Mets | GB vs Mets |
| CC                                                                                                                                          |               |               |               |               |                 |            |
| FA                                                                                                                                          | 0.198 ± 0.083 | 0.062 ± 0.017 | 0.047 ± 0.004 | <.001         | <.001           | 0.710      |
| ADC                                                                                                                                         | 0.713 ± 0.277 | 1.854 ± 0.682 | 2.164 ± 0.392 | <.001         | <.001           | 0.227      |
| $C_l$                                                                                                                                       | 9.6 ± 5.7     | 2.2 ± 0.9     | 1.6 ± 0.4     | <.001         | <.001           | 0.921      |
| $C_p$                                                                                                                                       | 7.0 ± 4.3     | 3.5 ± 1.0     | 2.6 ± 0.6     | 0.005         | <.001           | 0.673      |
| $C_s$                                                                                                                                       | 83.4 ± 7.2    | 94.0 ± 1.5    | 95.8 ± 0.5    | <.001         | <.001           | 0.558      |
| ER                                                                                                                                          |               |               |               |               |                 |            |
| FA                                                                                                                                          | 0.157 ± 0.033 | 0.117 ± 0.017 | 0.077 ± 0.020 | <.001         | <.001           | <.001      |
| ADC                                                                                                                                         | 0.961 ± 0.249 | 1.268 ± 0.145 | 1.271 ± 0.282 | 0.005         | 0.001           | .999       |
| $C_l$                                                                                                                                       | 4.5 ± 1.5     | 3.8 ± 0.9     | 2.3 ± 0.8     | 0.188         | <.001           | 0.001      |
| $C_p$                                                                                                                                       | 9.8 ± 2.5     | 7.7 ± 1.8     | 5.0 ± 1.4     | 0.017         | <.001           | <.001      |
| $C_s$                                                                                                                                       | 85.6 ± 3.7    | 88.4 ± 1.9    | 92.5 ± 1.8    | 0.012         | <.001           | <.001      |
| IZE                                                                                                                                         |               |               |               |               |                 |            |
| FA                                                                                                                                          | 0.124 ± 0.033 | 0.171 ± 0.038 | 0.153 ± 0.037 | 0.002         | 0.045           | 0.281      |
| ADC                                                                                                                                         | 1.440 ± 0.174 | 1.241 ± 0.151 | 1.282 ± 0.155 | 0.004         | 0.010           | 0.709      |
| $C_l$                                                                                                                                       | 4.0 ± 1.2     | 5.7 ± 1.4     | 5.3 ± 1.9     | 0.022         | 0.046           | 0.794      |
| $C_p$                                                                                                                                       | 7.7 ± 2.8     | 10.6 ± 3.6    | 8.7 ± 2.3     | 0.019         | 0.509           | 0.112      |
| $C_s$                                                                                                                                       | 88.2 ± 3.6    | 83.4 ± 3.8    | 85.8 ± 3.1    | 0.001         | 0.092           | 0.089      |
| DZE                                                                                                                                         |               |               |               |               |                 |            |
| FA                                                                                                                                          | 0.124 ± 0.032 | 0.103 ± 0.029 | 0.117 ± 0.032 | 0.180         | 0.811           | 0.345      |
| ADC                                                                                                                                         | 1.569 ± 0.115 | 1.645 ± 0.177 | 1.508 ± 0.343 | 0.716         | 0.758           | 0.258      |
| $C_l$                                                                                                                                       | 4.7 ± 1.5     | 3.8 ± 1.6     | 4.5 ± 1.8     | 0.308         | 0.909           | 0.429      |
| $C_p$                                                                                                                                       | 6.2 ± 2.5     | 5.6 ± 1.7     | 6.0 ± 2.2     | 0.793         | 0.984           | 0.840      |
| $C_s$                                                                                                                                       | 88.8 ± 3.4    | 90.5 ± 2.3    | 89.2 ± 2.9    | 0.286         | 0.925           | 0.376      |
| NAWM                                                                                                                                        |               |               |               |               |                 |            |
| FA                                                                                                                                          | 0.499 ± 0.071 | 0.500 ± 0.080 | 0.473 ± 0.085 | 1.000         | 0.579           | 0.563      |
| ADC                                                                                                                                         | 0.725 ± 0.036 | 0.758 ± 0.068 | 0.743 ± 0.082 | 0.414         | 0.691           | 0.792      |
| $C_l$                                                                                                                                       | 26.0 ± 7.0    | 27.1 ± 7.0    | 23.2 ± 7.2    | 0.913         | 0.421           | 0.202      |
| $C_p$                                                                                                                                       | 18.8 ± 7.9    | 15.8 ± 6.7    | 20.2 ± 9.1    | 0.604         | 0.851           | 0.232      |
| $C_s$                                                                                                                                       | 55.2 ± 6.8    | 57.0 ± 7.7    | 56.6 ± 9.2    | 0.826         | 0.857           | 0.987      |

<sup>a</sup>Data are mean ± SD. The units are  $\times 10^{-3}$  mm<sup>2</sup>/s for ADC values and percentage for  $C_l$ ,  $C_p$ , and  $C_s$ .

| On-line Table 2: Measures of sensitivity, specificity, and accuracy in discrimination of abscesses from glioblastoma and metastasis with ROC curve analysis |              |             |             |          |       |         |
|-------------------------------------------------------------------------------------------------------------------------------------------------------------|--------------|-------------|-------------|----------|-------|---------|
| Region/Metric                                                                                                                                               | Cutoff value | Sensitivity | Specificity | Accuracy | AUC   | P Value |
| CC                                                                                                                                                          |              |             |             |          |       |         |
| FA                                                                                                                                                          | 0.095        | 100         | 100         | 100      | 1.000 | <.001   |
| ADC                                                                                                                                                         | 1.296        | 100         | 85.2        | 90.5     | 0.973 | <.001   |
| $C_l$                                                                                                                                                       | 2.5          | 100         | 85.2        | 90.5     | 0.983 | <.001   |
| $C_p$                                                                                                                                                       | 4.5          | 80.0        | 92.6        | 88.1     | 0.873 | <.001   |
| $C_s$                                                                                                                                                       | 91.5         | 86.7        | 100         | 95.3     | 0.980 | <.001   |
| ER                                                                                                                                                          |              |             |             |          |       |         |
| FA                                                                                                                                                          | 0.135        | 80          | 97.6        | 92.8     | 0.950 | <.001   |
| ADC                                                                                                                                                         | 1.124        | 80          | 82.9        | 82.1     | 0.816 | <.001   |
| $C_l$                                                                                                                                                       | 3.5          | 73.3        | 75.6        | 75       | 0.806 | .001    |
| $C_p$                                                                                                                                                       | 7.5          | 86.7        | 73.2        | 76.8     | 0.871 | <.001   |
| $C_s$                                                                                                                                                       | 87.5         | 66.7        | 92.7        | 85.8     | 0.880 | <.001   |
| IZE                                                                                                                                                         |              |             |             |          |       |         |
| FA                                                                                                                                                          | 0.135        | 66.7        | 68.3        | 67.9     | 0.750 | .005    |
| ADC                                                                                                                                                         | 1.399        | 66.7        | 82.9        | 78.6     | 0.767 | .002    |
| $C_l$                                                                                                                                                       | 4.5          | 66.7        | 70.7        | 69.7     | 0.739 | .007    |
| $C_p$                                                                                                                                                       | 8.5          | 66.7        | 65.9        | 66.1     | 0.676 | .046    |
| $C_s$                                                                                                                                                       | 87.5         | 66.7        | 78.0        | 75.0     | 0.751 | .004    |
